# Supplementary material
Source: PubMed Central journal article supplement (PMC5840881)
Supplement: aww237_supp.pdf [file aww237_supp.pdf]

# Supplemental Table 1

| Antibody                                          | Species               | Company, catalog number      | Dilution |
|---------------------------------------------------|-----------------------|------------------------------|----------|
| <b>Western blotting</b>                           |                       |                              |          |
| human TDP-43                                      | mouse monoclonal      | Abnova, H00023435-M01        | 1:1000   |
| TDP-43                                            | rabbit polyclonal     | Proteintech, 10782-2-AP      | 1:2000   |
| TDP-43 C-term                                     | rabbit polyclonal     | Proteintech, 12892-1-AP      | 1:2000   |
| beta-actin                                        | mouse monoclonal      | Millipore, MAB1051           | 1:5000   |
| Alix/AIP-1                                        | mouse monoclonal      | BD Transduction Lab, 611621  | 1:1000   |
| Flotillin-1                                       | mouse monoclonal      | BD Transduction Lab, 610821  | 1:1000   |
| CD63                                              | mouse monoclonal      | Thermo Scientific, MA5-11501 | 1:1000   |
| Calnexin                                          | rabbit polyclonal     | Enzo, SPA-865                | 1:1000   |
| GM130                                             | rabbit polyclonal     | Novus Bio, NB101-57021       | 1:1000   |
| TGN46                                             | rabbit polyclonal     | Abcam, AB50595               | 1:1000   |
| TGN38                                             | rabbit polyclonal     | Santa Cruz, sc-33784         | 1:1000   |
| Rab27a                                            | rabbit polyclonal     | Synaptic System, 168 013     | 1:1000   |
| LC3                                               | rabbit polyclonal     | MBL, PM036                   | 1:1000   |
| p62                                               | guinea pig polyclonal | MBL, PM066                   | 1:1000   |
| V5                                                | mouse monoclonal      | Invitrogen, R960-25          | 1:2000   |
| <b>Immunofluorescent and immunohistochemistry</b> |                       |                              |          |
| SMI-31                                            | mouse monoclonal      | Covance, SMI31R              | 1:200    |
| SV2                                               | mouse monoclonal      | DSHB, AB2315387              | 1:50     |
| TDP-43                                            | rabbit polyclonal     | Proteintech, 10782-2-AP      | 1:1000   |
| pTDP-43<br>(ser409/410)                           | rabbit polyclonal     | Cosmo Bio, CAC-TIP-PTD-P01   | 1:1000   |
| pTDP-43<br>(ser409/410)                           | mouse monoclonal      | Cosmo Bio, CAC-TIP-PTD-M01   | 1:1000   |
| NeuN                                              | mouse monoclonal      | Cell Signaling, D3531        | 1:1000   |
| Laminin                                           | rabbit polyclonal     | Sigma Aldrich, L9393         | 1:200    |
| ChAT                                              | goat polyclonal       | Millipore, AB144P            | 1:200    |
| <b>Immunoelectron microscopy</b>                  |                       |                              |          |
| V5                                                | mouse monoclonal      | Invitrogen, R960-25          | 1:1000   |
| CD63                                              | mouse monoclonal      | Thermo Scientific, MA5-11501 | 1:100    |
| Alix/AIP-1                                        | mouse monoclonal      | BD Transduction Lab, 611621  | 1:500    |
| human TDP-43                                      | mouse monoclonal      | Abnova, H00023435-M01        | 1:500    |

## Supplemental Table 2

### Sporadic ALS

|   | Clinical diagnosis | Age/Gender | Duration |
|---|--------------------|------------|----------|
| 1 | ALS-FTD            | 71/M       | 3 years  |
| 3 | ALS                | 66/M       | 3 years  |
| 5 | ALS                | 58/F       | 12 years |

### Disease control

|   | Clinical diagnosis | Age/Gender |
|---|--------------------|------------|
| 2 | MSA-C              | 63/F       |
| 3 | FAP                | 71/M       |
| 4 | CIDP               | 74/M       |

MSA-C: multiple system atrophy cerebellar dysfunction subtype

FAP: familial amyloid polyneuropathy

CIDP: Chronic inflammatory demyelinating polyneuropathy

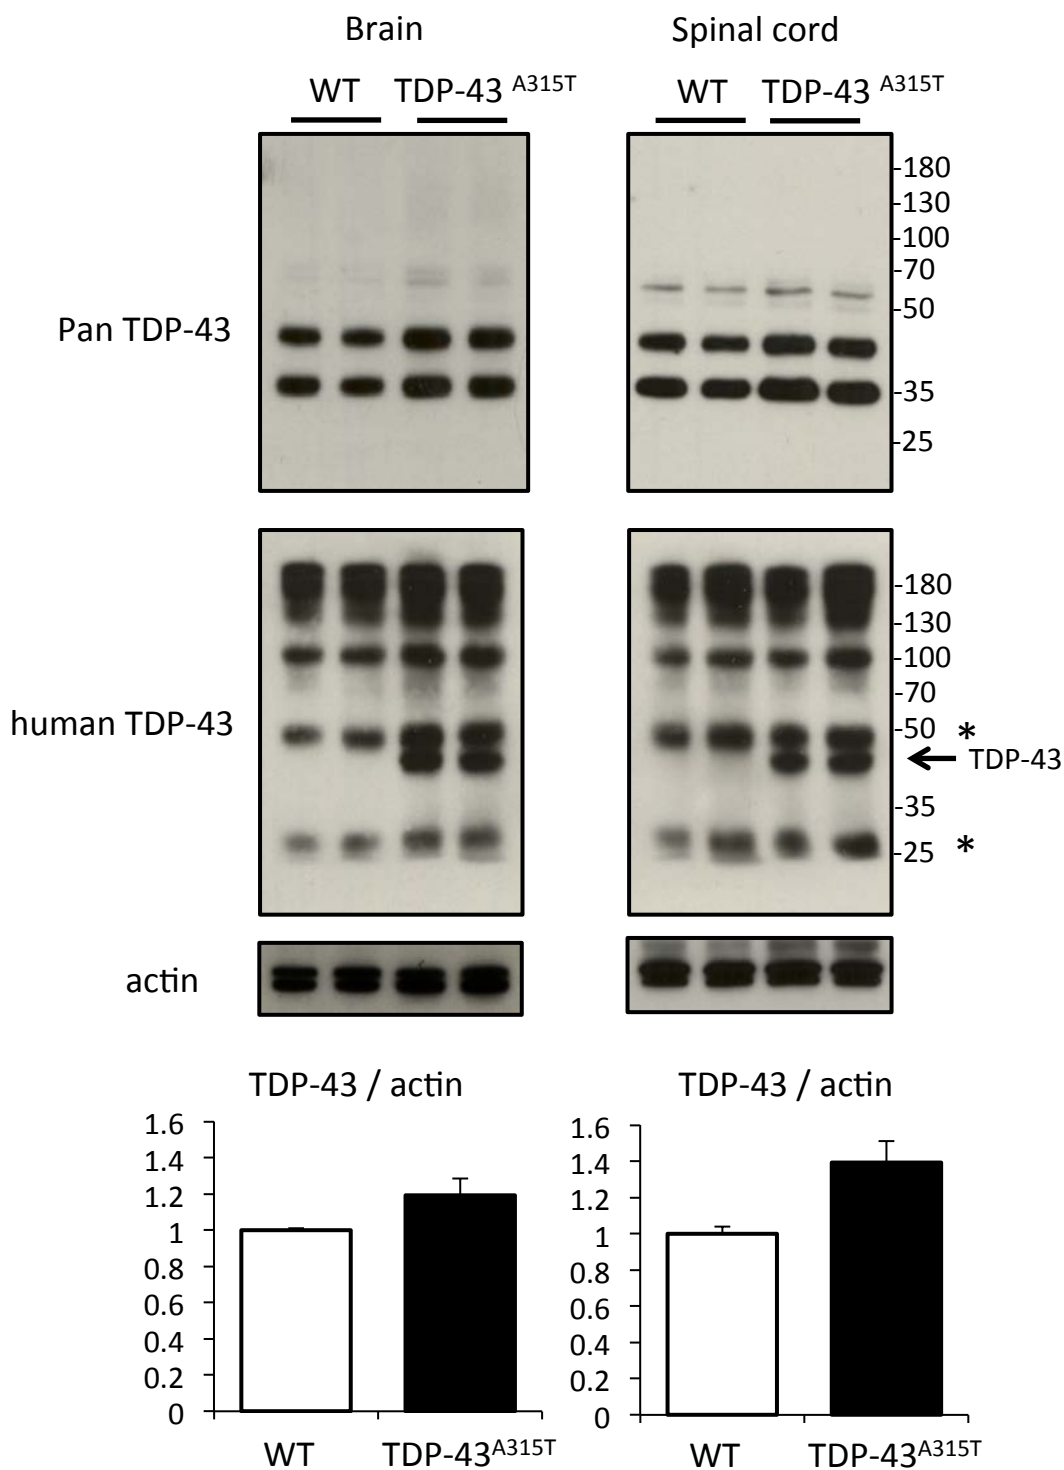

Figure S1. Immunoblots of brain and spinal cord of WT or TDP-43<sup>A315T</sup> mice. Asterisks indicate non-specific immunoglobulin bands.

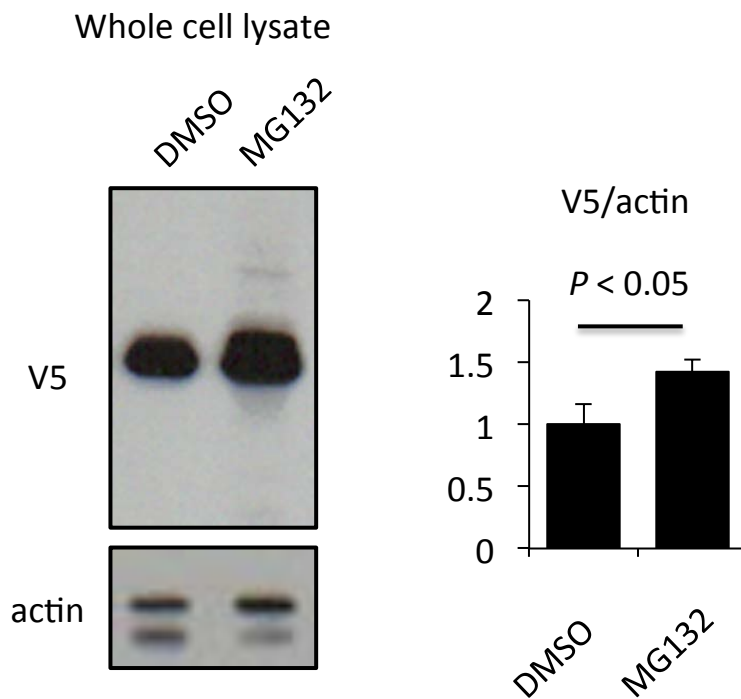

Figure S2. Immunoblots of whole cell lysate of Neuro2a cells treated with DMSO or MG132, and its densitometric analysis.

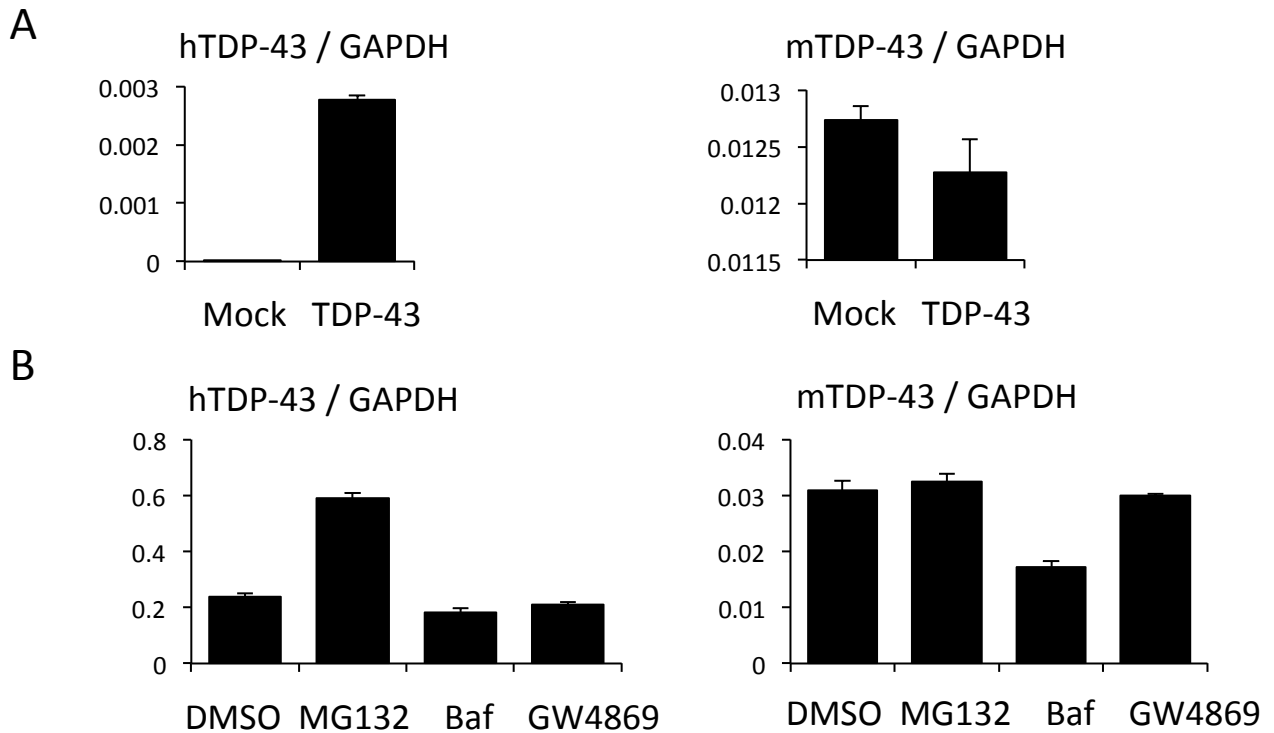

Figure S3. RT qPCR analysis of human and mouse TDP-43 in Neuro2a cells. (A) Neuro2a cells transfected with mock or human TDP-43 plasmid were analyzed. (B) Neuro2a cells treated with DMSO, MG132, Bafilomycin, or GW4869 were analyzed. All cells were transfected with human TDP-43.

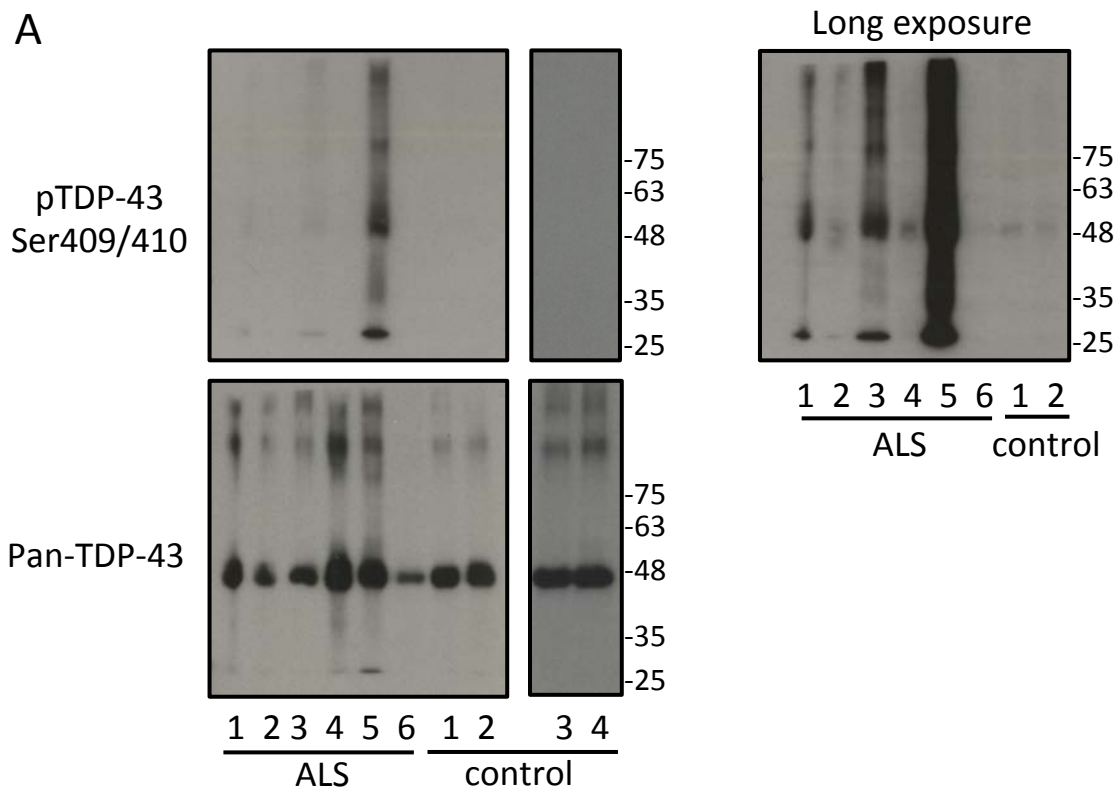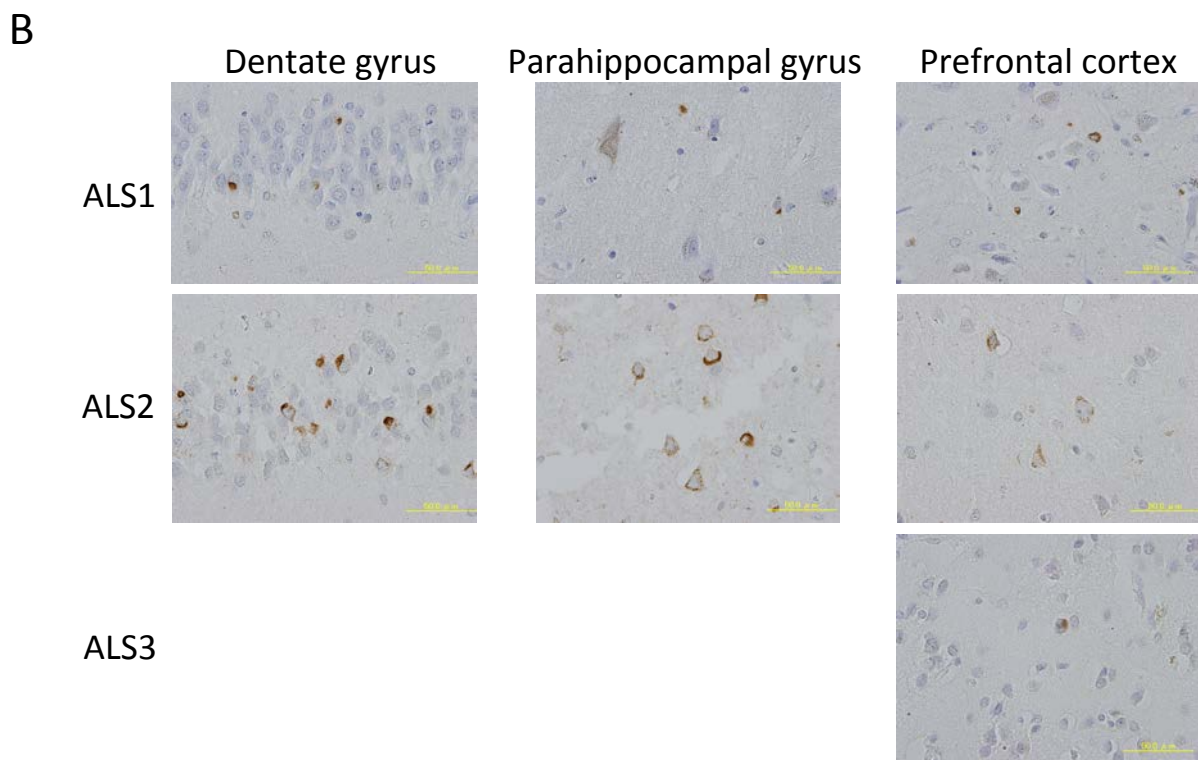

Figure S4. (A) Immunoblots of sarkosyl-insoluble fraction of control or ALS brains. ALS-1, 3, and 5 were positive for phosphorylated TDP-43. (B) Immunohistochemistry of dentate gyrus, parahippocampal gyrus, and prefrontal cortex of ALS patients using phospho-specific TDP-43 antibody.

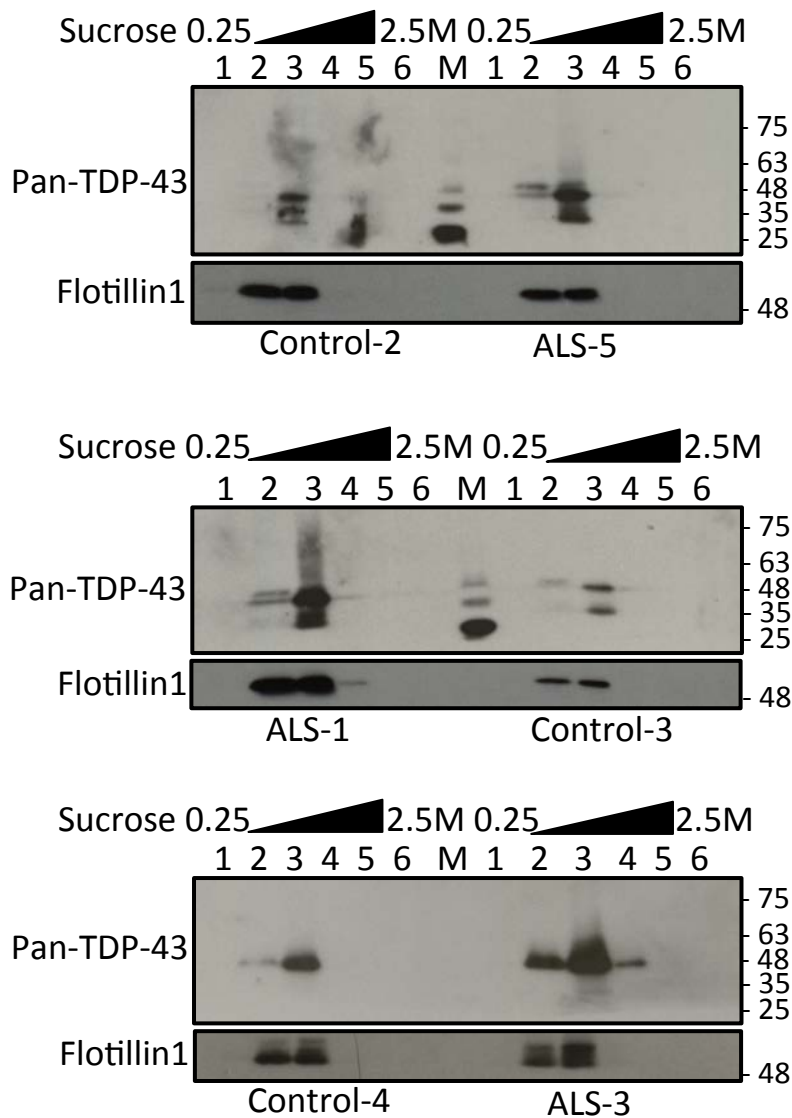

Figure S5. Sucrose density gradient fractionation of extracellular matrix of control or ALS brains. TDP-43 and Flotillin 1 were predominantly detected in the second and third fractions.

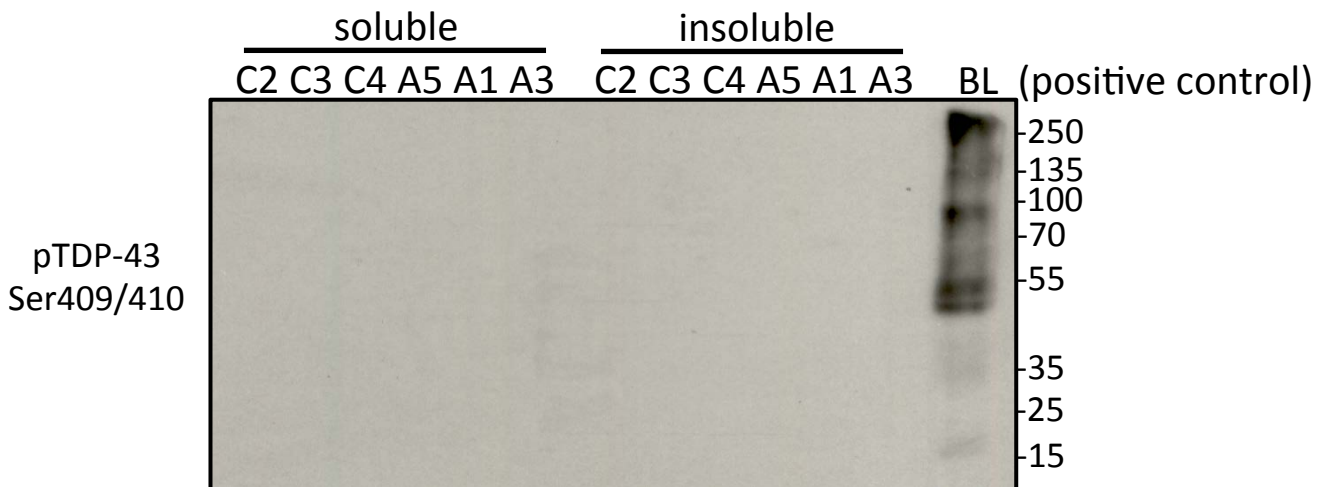

Figure S6. Immunoblot of exosome fractions of control or ALS brains with salkosyl-insoluble brain lysate (BL) of ALS-5 (positive control).



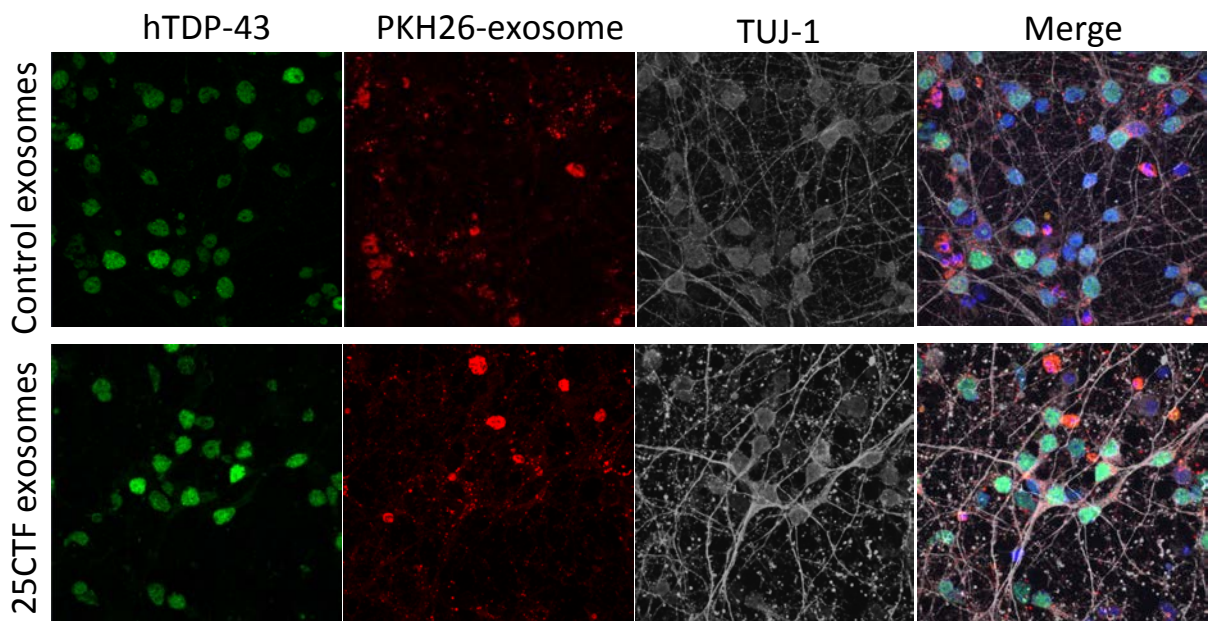

Figure S7. Immunofluorescent images of primary cortical neurons of TDP-43<sup>G348C</sup> mouse treated with control or TDP-43 25CTF-containing exosomes.

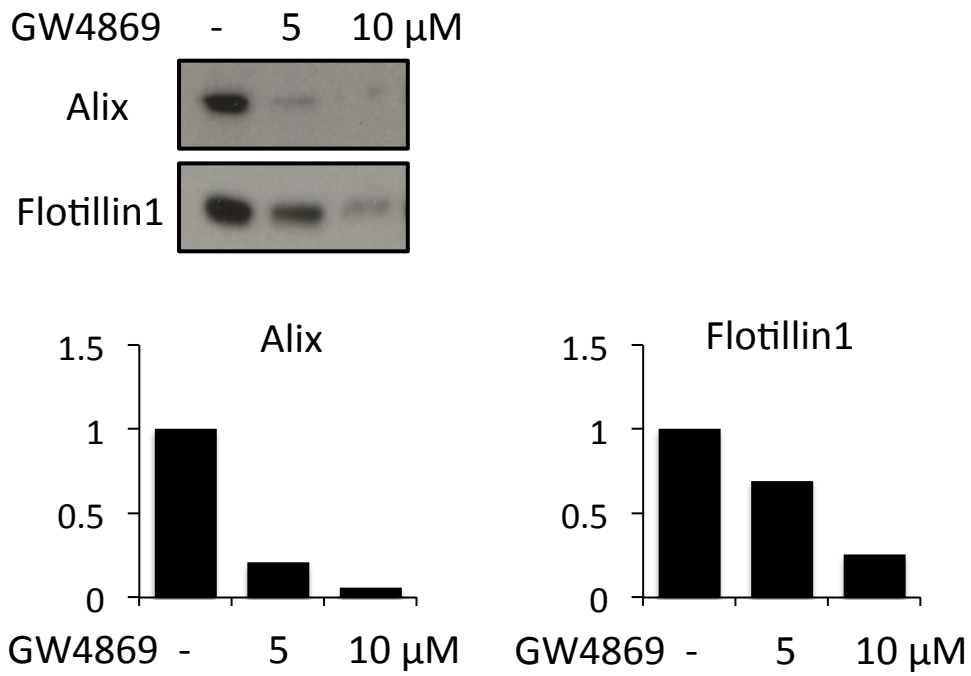

Figure S8. Immunoblots of exosome fraction purified from Neuro2a cells treated with GW4869 for 24 h.

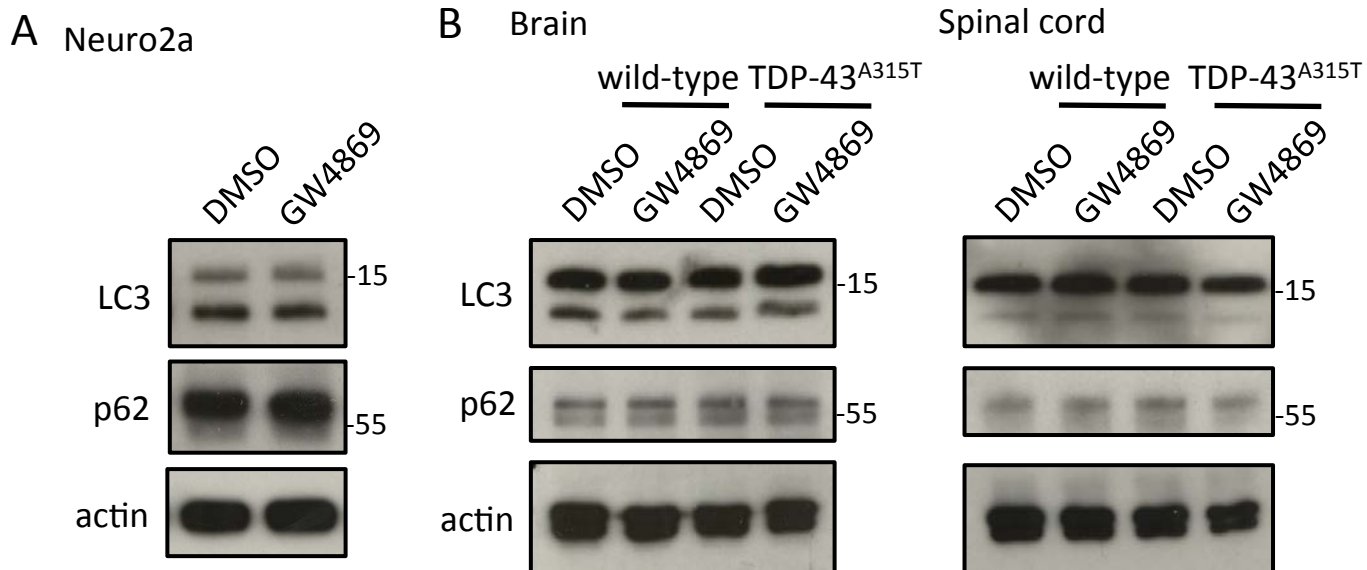

Figure S9. (A) Immunoblots of cell lysate (RIPA-soluble fraction) of Neuro2a cells treated with DMSO or GW4869. (B and C) Immunoblots of mouse brain and spinal cord (RIPA-soluble fraction) of wild-type or TDP-43<sup>A315T</sup> mice treated with DMSO or GW4869.

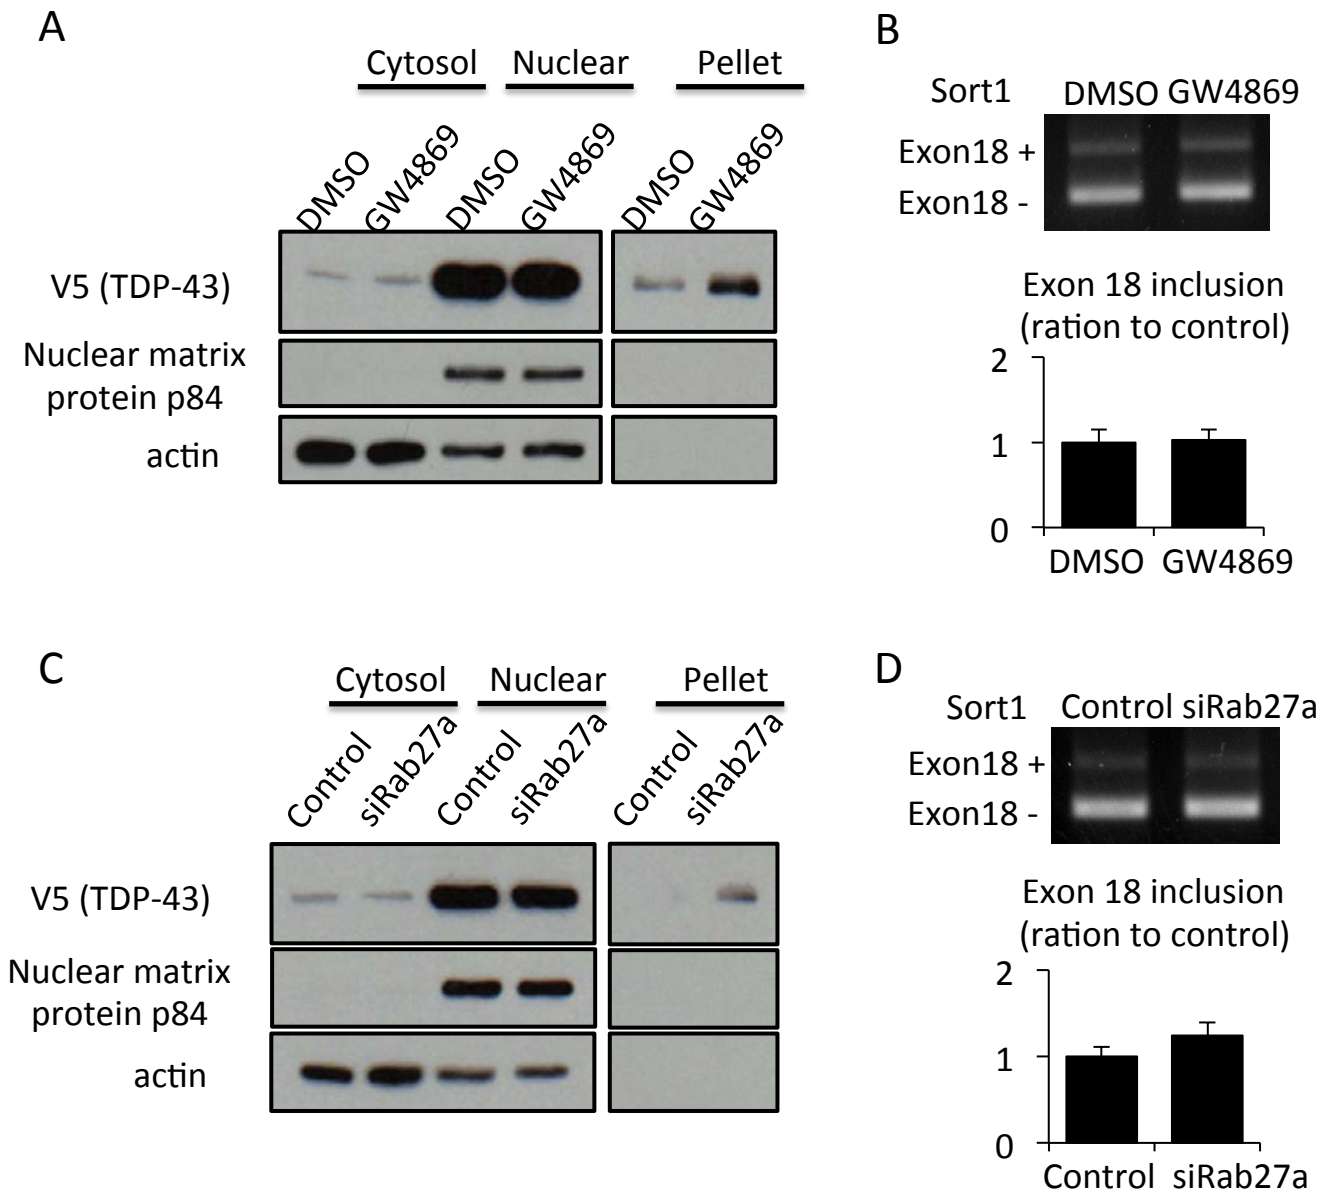

Figure S10. (A) Immunoblots of cytosol, nuclear fractions and insoluble pellet of Neuro2a cells treated with DMSO or GW4869. (B) Semi-quantitative RT-PCR of Sort1 showing two splice variants, and quantification of exon18 inclusion from three biological replicas per group. (C) Immunoblots of cytosol, nuclear fractions and insoluble pellet of Neuro2a cells silencing Rab27a or its control. (D) Semi-quantitative RT-PCR of Sort1 showing splice changes, and quantification of exon18 inclusion from three biological replicas per group.

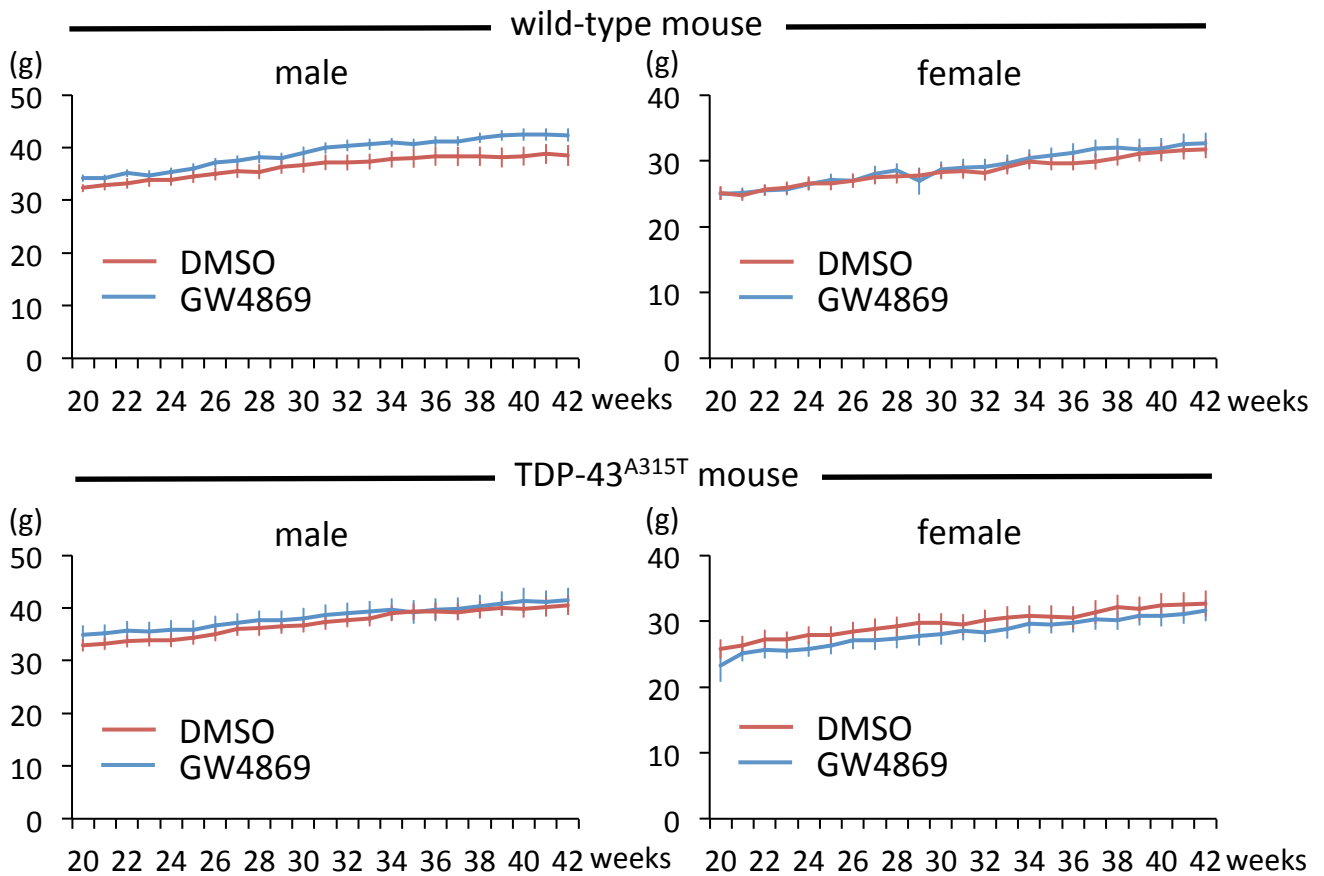

Figure S11. Body weight of wild-type and TDP-43<sup>A315T</sup> mice treated with DMSO or GW4869.

## Motor neuron number

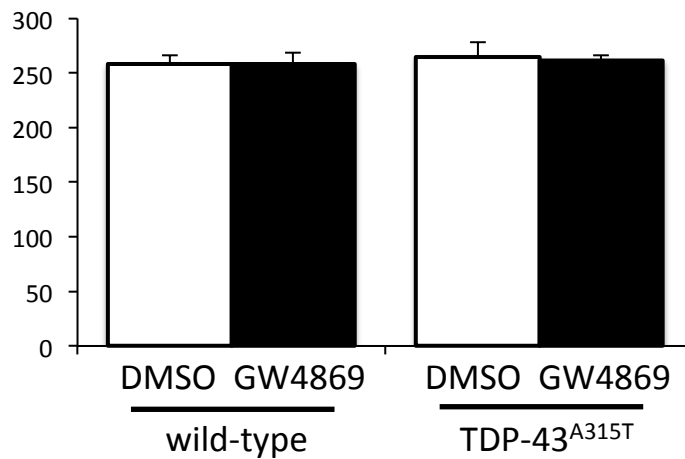

wild-type

TDP-43<sup>A315T</sup>

DMSO

GW4869

DMSO

GW4869

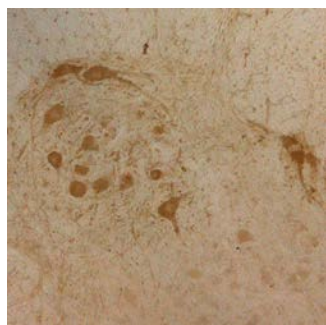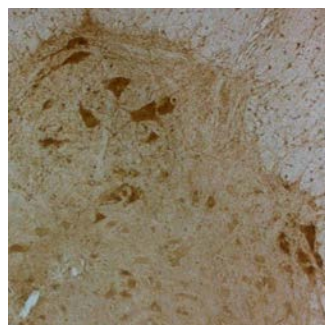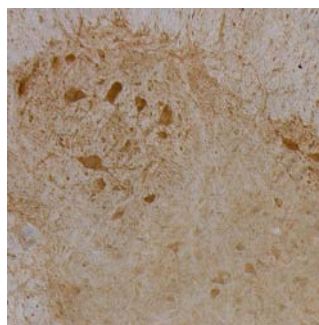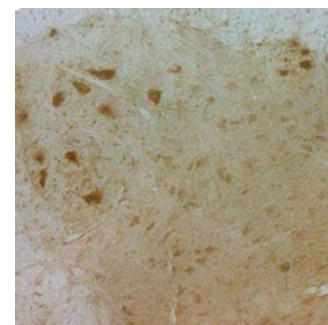

Figure S12. Motor neuron number in lumbar spinal cord. Immunohistochemistry of ChAT was done with every tenth 25- $\mu$ m-thick section from 100 consecutive sections of lumbar spinal cord, and total number of motor neuron was analyzed.

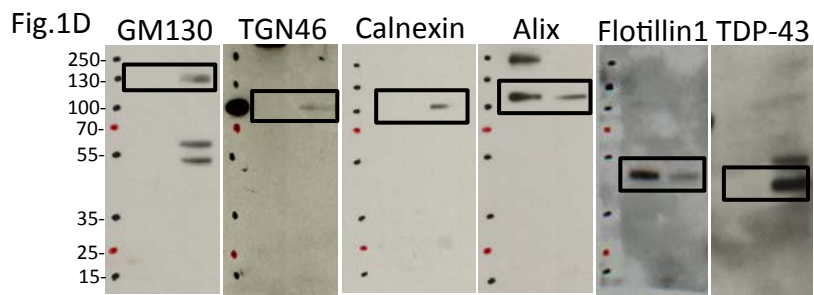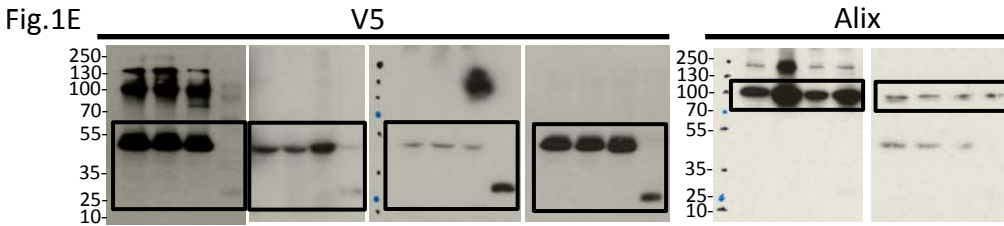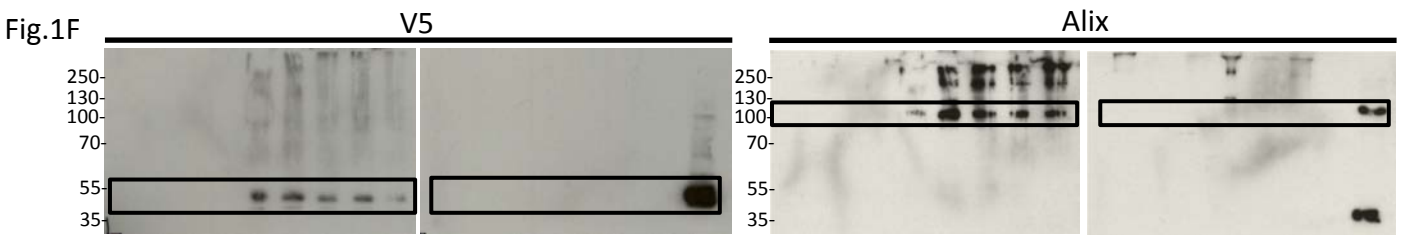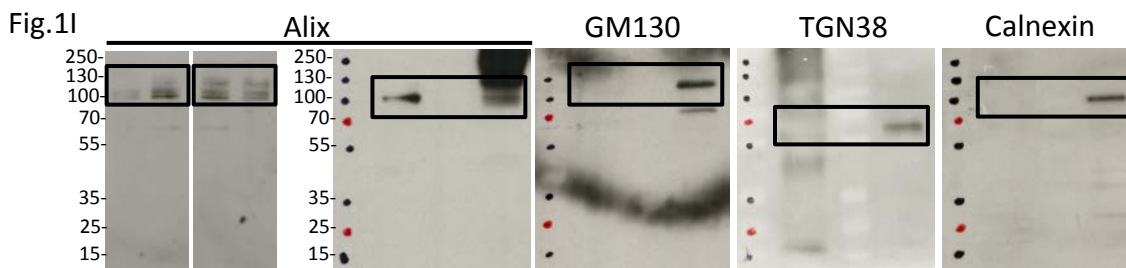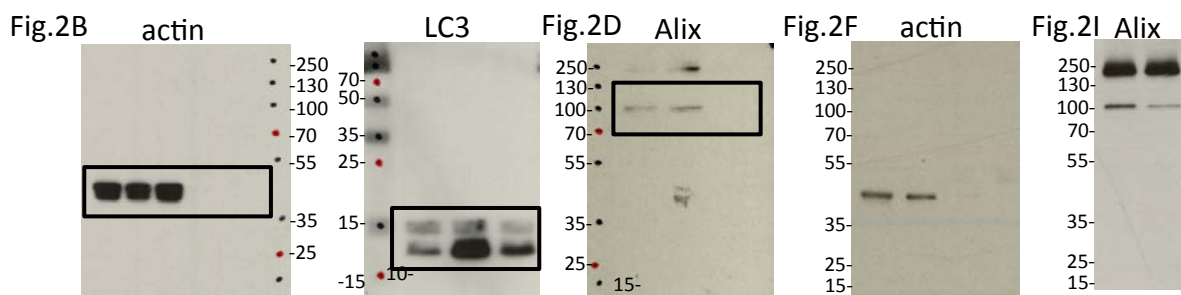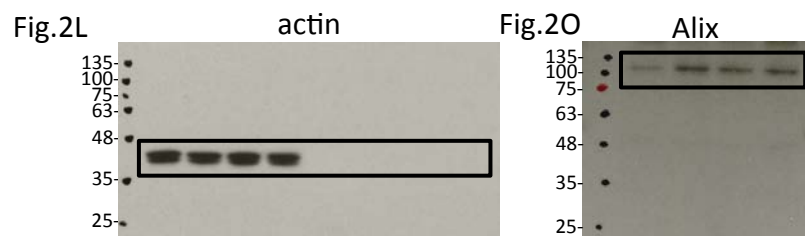

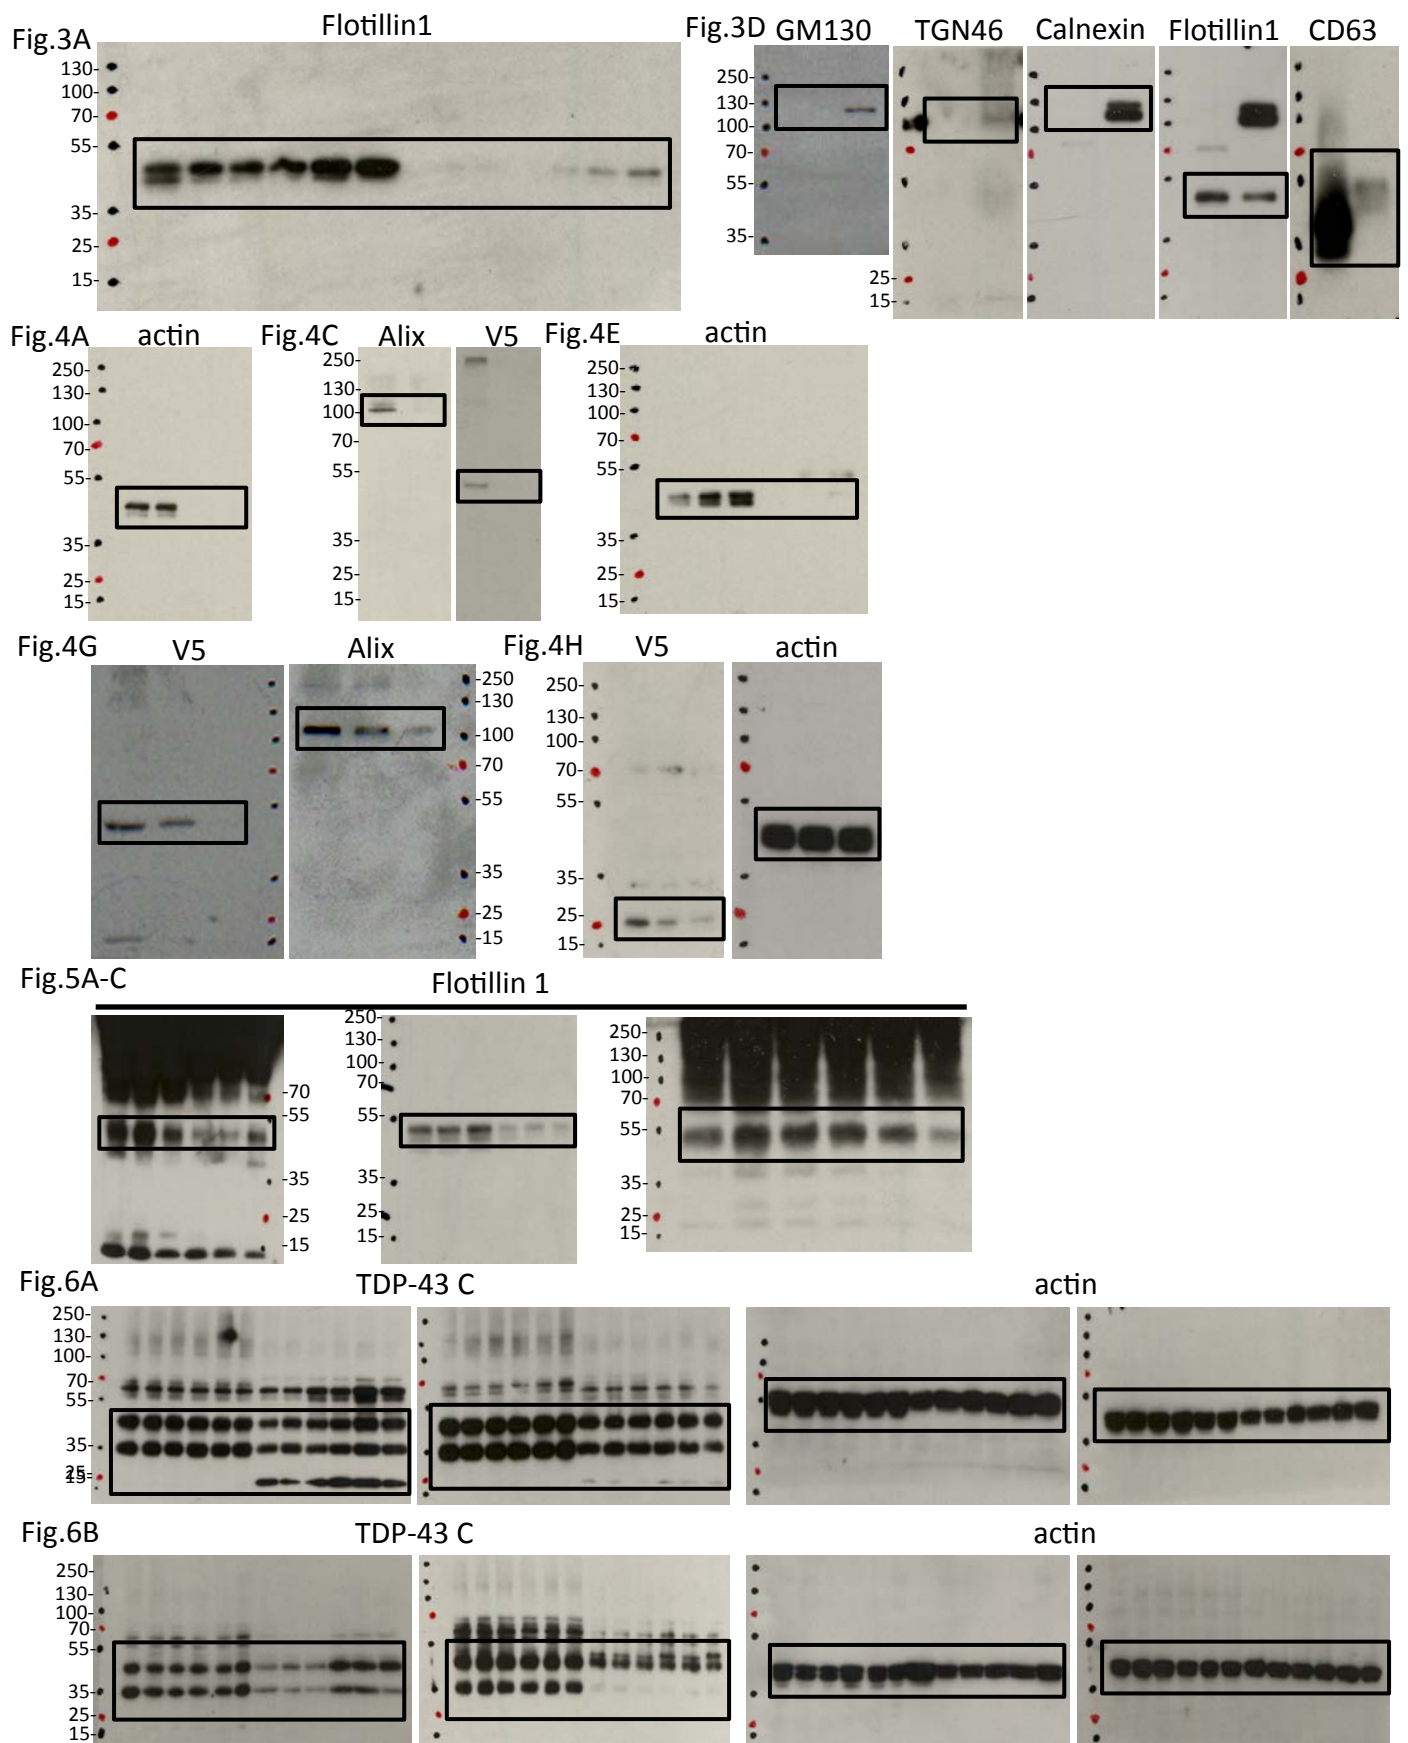

Figure S13. Uncropped full-length blots of main figures.



## **Supplementary materials and methods**

### **Analysis of insoluble fraction of human brain**

To confirm the existence of TDP-43 pathology we checked sarkosyl insoluble fractions of brain samples. First, 100 mg of brain tissues were homogenized with 1ml of buffer A (10mM Tris-HCl, pH 7.5 with 1mM EGTA, 10% sucrose, 0.8M NaCl). Next, we added 1ml of 2% TritonX-100 buffer (in buffer A), incubated for 30min at 37°C, and centrifuged at 100,000g for 30min at 25°C. The supernatant was discarded, and the pellet was resuspended with 1% Sarkosyl buffer (in buffer A). The homogenate was incubated for 30min at 37°C, and centrifuged at 100,000g for 30min at 37°C. After the supernatant was discarded, the pellet was resuspended with 150 µl of PBS. Ten-µl of that solution was used for immunoblots with anti-phospho TDP-43 (Ser409/Ser410) monoclonal antibody (Cosmo Bio) and pan-TDP-43 polyclonal antibody (Proteintech).

### **Nuclear and Cytoplasmic Extractions**

Cells cultured in 6-well plate were harvested with 500 µl of buffer A (10mM HEPES pH 7.9, 1.5mM MgCl<sub>2</sub>, 10mM KCl, 0.1mM EDTA, 0.1% NP-40, 1mM DTT), incubated at 4°C for 30 min, and centrifuged at 1000 g for 5min. Supernatant was kept for cytoplasmic fraction. The pellet was resuspended with 200 µl of buffer B (20mM HEPES pH 7.9, 1.5mM MgCl<sub>2</sub>, 400mM NaCl, 0.1mM EDTA, 0.1% NP-40, 10% Glycerol, 1mM DTT), incubated at 4°C for 30 min, and sonicated. The suspension was centrifuged at 15,000g for 5min. Supernatant was nuclear fraction. The pellet was resuspended with 200 µl of 3% SDS sample buffer. Twenty-µg protein was loaded and separated by SDS-PAGE.

### **Immunohistochemistry**

The human brain tissues were fixed in 20% neutral-buffered formalin. The paraffin-embedded tissue blocks were cut at a thickness of 4.5µm. Mouse lumbar spinal cords were taken from 4% paraformaldehyde-perfused mice. For the analysis of spinal motor neuron immunohistochemistry of ChAT was done with every tenth 25-µm-thick section of lumbar spinal cord from 100 consecutive sections of lumbar spinal cord, and total number of motor neuron was analyzed.

### **RT-PCR for alternative splicing analysis**

Total RNA was isolated from cells using Absolutely RNA Miniprep Kit (Agilent). cDNA was synthesized from 1 µg of total RNA with the Oligo-dT primer (Invitrogen). The sequences of primers against Sort1 are ATGAATCCCGCCAGAGAAG and GACAAGCATCAGTCCCACGA. Semi-quantitative RT-PCR was performed using Taq DNA polymerase (Bio Basic).
